# Supplementary material for: Multifunctional Three-Dimensional Printed Copper Loaded Calcium Phosphate Scaffolds for Bone Regeneration
Source: Pharmaceuticals (Basel). 2023 Feb 25;16(3):352. doi: 10.3390/ph16030352 (PMC10052742; doi:10.3390/ph16030352)
Supplement: Supplementary file 1 [file pharmaceuticals-16-00352-s001.zip › pharmaceuticals-2165067-supplementary.pdf]

## **Supplementary Information**

### **Multifunctional three-dimensional printed copper loaded calcium phosphate scaffolds for bone regeneration**

Amit Pillai<sup>#</sup>, Jaidev Chakka<sup>#</sup>, Niloofar Heshmati, Yu Zhang, Faez Alkadi, and Mohammed Maniruzzaman<sup>\*</sup>

PharmE3D lab, Division of Molecular Pharmaceutics, College of Pharmacy, The University of Texas at Austin, TX 78712, USA

<sup>\*</sup>Corresponding Author; <sup>#</sup>Equal contribution

### **Results**

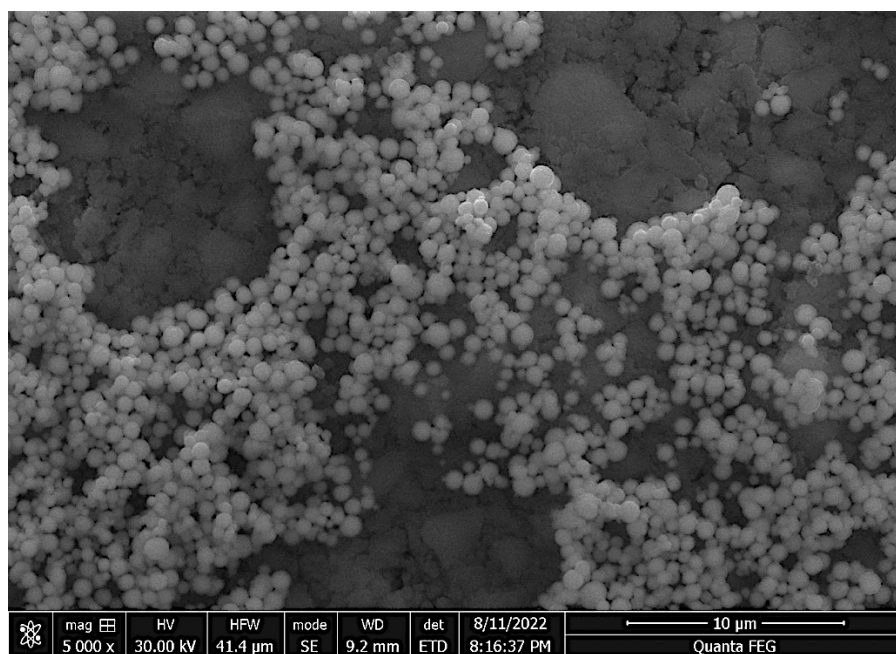

Figure S1: The scanning electron microscopy of copper nanoparticles with an average particle size of 300 nm procured from a commercial vendor.
